# Supplementary material for: Tunable electroluminescence properties in CdSe/PVK guest–host based light-emitting devices
Source: Royal Society of Chemistry journal article supplement (doi:10.1039/c4cp00066h), 2014-01-01
Supplement: c4cp00066h1.pdf [file c4cp00066h1.pdf]

## Supporting Information

### Tunable Electroluminescent Properties in CdSe/PVK Guest-Host Based Light-Emitting Devices

Jin Young Park<sup>\*a</sup> and Rigoberto C. Advincula<sup>#b,c</sup>

<sup>a</sup> Department of Polymer Science and Engineering, Kyungpook National University, 80 Daehak-ro, Buk-gu, Daegu, 702-701 Republic of Korea.

<sup>b</sup> Department of Chemistry, University of Houston, 136 Fleming Bldg., Houston, TX 77204, USA.

<sup>c</sup> Macromolecular Science & Engineering, Case Western Reserve University, 2100 Adelbert Rd., Kent Hale Smith Bldg., Cleveland, OH 44106, USA.

\* Corresponding author. Fax: 53 950 6623; Tel: 53 950 5624; E-mail: [jinpark@knu.ac.kr](mailto:jinpark@knu.ac.kr) (J. Y. Park).

# Co-corresponding author. Fax: 216 368 4202; Tel: 216 368 4566; E-mail: [rca41@case.edu](mailto:rca41@case.edu) (R. C. Advincula).

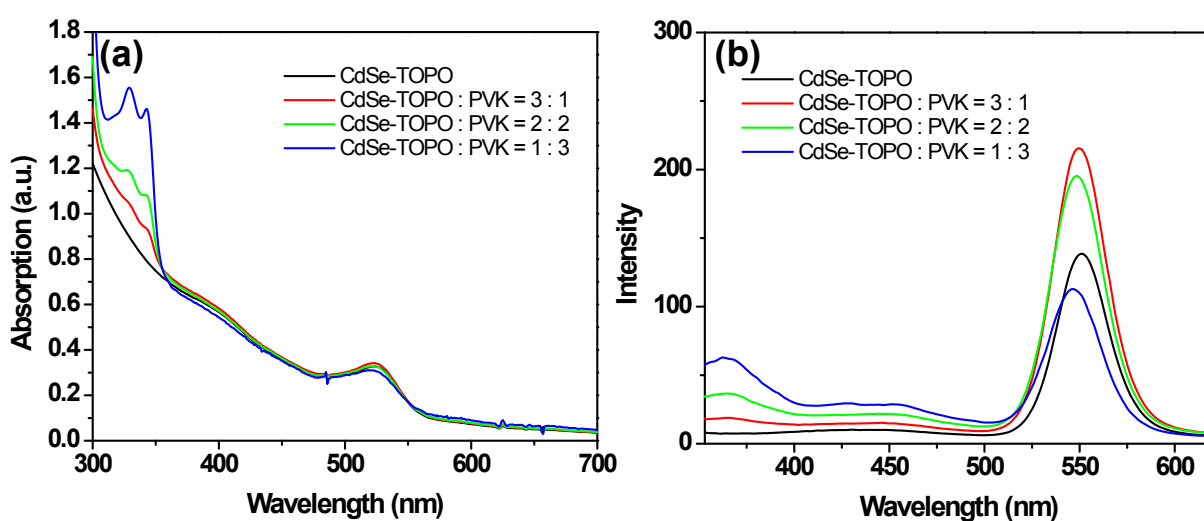

Fig. S1. (a) UV-Vis absorbance and (b) PL spectra of CdSe-TOPO, CdSe-TOPO and PVK mixtures in THF (3:1, 2:2, 1:3 in weight). Total concentration of each solution is 1 mg/ml.

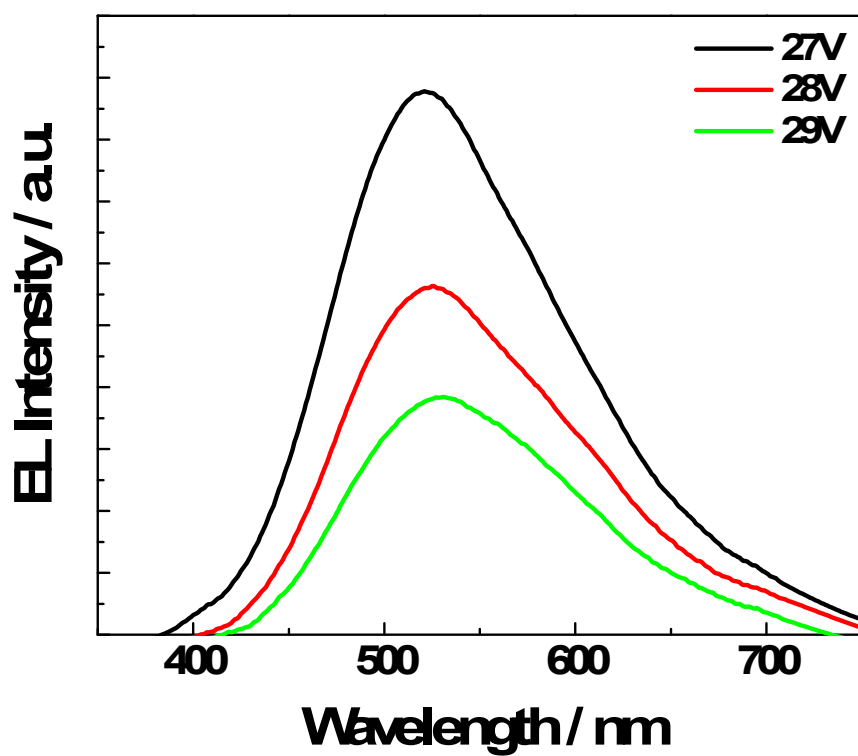

Fig. S2. EL spectra of QD-LED with configuration of ITO/PEDOT:PSS/PVK:PBD:QD(1wt%)/LiF/Al with increasing applied bias voltages (27V - 29V).
